# Supplementary figures and images for: A graph theoretic approach to utilizing protein structure to identify non-random somatic mutations
Source: Springer Nature journal article supplement (doi:10.1186/1471-2105-15-86), 2014-03-26

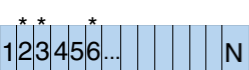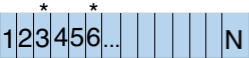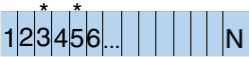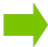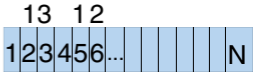

$$X_{(1)} = 2$$

$$X_{(2)} = X_{(3)} = X_{(4)} = 3$$

$$X_{(5)} = 5$$

$$X_{(6)} = X_{(7)} = 6$$

Supplement: 12859_2013_6829_MOESM10_ESM.pdf [file 12859_2013_6829_MOESM10_ESM.pdf]
